# Supplementary material for: Investigating the relationship between sleep disturbances and psychopathology In children and adolescents with microdeletion of 22q11 chromosome: an exploratory study
Source: Frontiers journal article supplement (doi:10.3389/fpsyt.2025.1595492), 2025-07-23
Supplement: Table_1.docx [file Table_1.docx]

| **Table 1 S. Descriptive analysis** | | | | | | | | | | | | | |
| --- | --- | --- | --- | --- | --- | --- | --- | --- | --- | --- | --- | --- | --- |
|  | | **Group** | | **N** | | **Mean** | | **Med** | | **SD** | | **SE** | |
| QI TOT |  | 1 |  | 16 |  | 72.50 |  | 74.00 |  | 19.799 |  | 4.9497 |  |
|  | | 2 |  | 36 |  | 68.944 |  | 70.50 |  | 23.752 |  | 3.9587 |  |
| WISC-IV_ICV |  | 1 |  | 16 |  | 75.13 |  | 74.00 |  | 15.509 |  | 3.8771 |  |
|  | | 2 |  | 36 |  | 73.833 |  | 74.00 |  | 15.279 |  | 2.5466 |  |
| WISC-IV_IRP |  | 1 |  | 16 |  | 72.44 |  | 73.00 |  | 9.571 |  | 2.3926 |  |
|  | | 2 |  | 36 |  | 72.889 |  | 73.00 |  | 17.497 |  | 2.9162 |  |
| WISC-IV_IML |  | 1 |  | 16 |  | 73.94 |  | 73.00 |  | 12.572 |  | 3.1431 |  |
|  | | 2 |  | 36 |  | 72.111 |  | 73.00 |  | 12.981 |  | 2.1635 |  |
| WISC IV_IVE |  | 1 |  | 16 |  | 71.19 |  | 72.00 |  | 12.592 |  | 3.1480 |  |
|  | | 2 |  | 36 |  | 71.750 |  | 72.00 |  | 15.489 |  | 2.5815 |  |
| ABAS-GAC comp |  | 1 |  | 16 |  | 71.75 |  | 76.50 |  | 18.707 |  | 4.6766 |  |
|  | | 2 |  | 36 |  | 76.333 |  | 74.00 |  | 18.848 |  | 3.1414 |  |
| ABAS-DAC comp |  | 1 |  | 16 |  | 74.31 |  | 74.50 |  | 16.198 |  | 4.0494 |  |
|  | | 2 |  | 36 |  | 80.722 |  | 79.00 |  | 17.793 |  | 2.9656 |  |
| ABAS-DAS comp |  | 1 |  | 16 |  | 75.56 |  | 73.50 |  | 19.384 |  | 4.8459 |  |
|  | | 2 |  | 36 |  | 73.750 |  | 72.00 |  | 21.367 |  | 3.5611 |  |
| ABAS-DAP comp |  | 1 |  | 16 |  | 74.94 |  | 77.00 |  | 17.823 |  | 4.4558 |  |
|  | | 2 |  | 36 |  | 79.722 |  | 79.00 |  | 18.233 |  | 3.0388 |  |
| ABAS-GAC perc |  | 1 |  | 16 |  | 14.19 |  | 11.00 |  | 17.585 |  | 4.3962 |  |
|  | | 2 |  | 36 |  | 20.556 |  | 4.00 |  | 27.366 |  | 4.5610 |  |
| ABAS-DAC perc |  | 1 |  | 16 |  | 13.94 |  | 7.00 |  | 17.456 |  | 4.3641 |  |
|  | | 2 |  | 36 |  | 22.306 |  | 14.50 |  | 26.276 |  | 4.3794 |  |
| ABAS-DAS perc |  | 1 |  | 16 |  | 18.50 |  | 5.00 |  | 25.815 |  | 6.4537 |  |
|  | | 2 |  | 36 |  | 18.417 |  | 6.50 |  | 24.647 |  | 4.1078 |  |
| ABAS-DAP perc |  | 1 |  | 16 |  | 14.94 |  | 9.00 |  | 16.623 |  | 4.1558 |  |
|  | | 2 |  | 36 |  | 20.617 |  | 11.50 |  | 26.242 |  | 4.3737 |  |
| MASC2_Self_Tot |  | 1 |  | 16 |  | 59.00 |  | 55.00 |  | 7.992 |  | 1.9979 |  |
|  | | 2 |  | 36 |  | 52.861 |  | 55.00 |  | 8.546 |  | 1.4244 |  |
| MASC2_Self_Ansia sep/fobie |  | 1 |  | 16 |  | 59.94 |  | 57.00 |  | 6.223 |  | 1.5558 |  |
|  | | 2 |  | 36 |  | 55.333 |  | 57.00 |  | 8.559 |  | 1.4265 |  |
| MASC2_Self_GAD |  | 1 |  | 16 |  | 56.81 |  | 53.00 |  | 8.526 |  | 2.1315 |  |
|  | | 2 |  | 36 |  | 50.972 |  | 53.00 |  | 7.245 |  | 1.2074 |  |
| MASC2_Self_Ansia sociale |  | 1 |  | 16 |  | 58.13 |  | 54.00 |  | 7.347 |  | 1.8368 |  |
|  | | 2 |  | 36 |  | 52.111 |  | 54.00 |  | 6.619 |  | 1.1032 |  |
| MASC2_Self_umil/rif |  | 1 |  | 16 |  | 53.44 |  | 50.00 |  | 7.266 |  | 1.8165 |  |
|  | | 2 |  | 36 |  | 48.444 |  | 50.00 |  | 5.916 |  | 0.9860 |  |
| MASC2_Self_Ansia prest |  | 1 |  | 16 |  | 61.94 |  | 58.00 |  | 9.277 |  | 2.3192 |  |
|  | | 2 |  | 36 |  | 56.333 |  | 58.00 |  | 7.247 |  | 1.2078 |  |
| MASC2_Self_oss/comp |  | 1 |  | 16 |  | 53.94 |  | 52.00 |  | 8.258 |  | 2.0645 |  |
|  | | 2 |  | 36 |  | 51.194 |  | 52.00 |  | 9.099 |  | 1.5165 |  |
| MASC2_Self_sint.fisici |  | 1 |  | 16 |  | 57.63 |  | 54.00 |  | 8.891 |  | 2.2228 |  |
|  | | 2 |  | 36 |  | 51.278 |  | 54.00 |  | 7.214 |  | 1.2023 |  |
| MASC2_Self_panico |  | 1 |  | 16 |  | 54.75 |  | 52.00 |  | 9.342 |  | 2.3354 |  |
|  | | 2 |  | 36 |  | 49.667 |  | 52.00 |  | 6.405 |  | 1.0676 |  |
| MASC2_Self_tensione |  | 1 |  | 16 |  | 58.50 |  | 54.00 |  | 8.524 |  | 2.1311 |  |
|  | | 2 |  | 36 |  | 51.861 |  | 54.00 |  | 7.706 |  | 1.2843 |  |
| MASC2_Self_evit.peric |  | 1 |  | 16 |  | 53.13 |  | 52.00 |  | 4.015 |  | 1.0036 |  |
|  | | 2 |  | 36 |  | 51.556 |  | 52.00 |  | 4.748 |  | 0.7913 |  |
| MASC2_Self_probab. Ansia |  | 1 |  | 16 |  | 1.38 |  | 1.00 |  | 0.885 |  | 0.2213 |  |
|  | | 2 |  | 36 |  | 0.917 |  | 1.00 |  | 0.770 |  | 0.1283 |  |
| MASC2_Self_ind. Incoerenza |  | 1 |  | 16 |  | 5.63 |  | 5.00 |  | 1.360 |  | 0.3400 |  |
|  | | 2 |  | 36 |  | 4.722 |  | 5.00 |  | 1.684 |  | 0.2806 |  |
| MASC2_Parent_Tot |  | 1 |  | 16 |  | 62.13 |  | 61.00 |  | 10.850 |  | 2.7124 |  |
|  | | 2 |  | 36 |  | 61.250 |  | 61.00 |  | 12.429 |  | 2.0715 |  |
| MASC2_Parent_Ansia sep/fobie |  | 1 |  | 16 |  | 58.31 |  | 59.00 |  | 9.978 |  | 2.4945 |  |
|  | | 2 |  | 36 |  | 59.639 |  | 59.00 |  | 11.167 |  | 1.8611 |  |
| MASC2_Parent_GAD |  | 1 |  | 16 |  | 66.06 |  | 64.00 |  | 7.611 |  | 1.9028 |  |
|  | | 2 |  | 36 |  | 64.111 |  | 64.00 |  | 12.247 |  | 2.0412 |  |
| MASC2_Parent_Ansia sociale |  | 1 |  | 16 |  | 69.38 |  | 69.00 |  | 9.069 |  | 2.2673 |  |
|  | | 2 |  | 36 |  | 63.778 |  | 63.50 |  | 17.391 |  | 2.8986 |  |
| MASC2_Parent_umil/rif |  | 1 |  | 16 |  | 65.63 |  | 62.00 |  | 9.584 |  | 2.3960 |  |
|  | | 2 |  | 36 |  | 60.889 |  | 62.00 |  | 15.054 |  | 2.5090 |  |
| MASC2_Parent_Ansia prest |  | 1 |  | 16 |  | 65.44 |  | 65.00 |  | 9.791 |  | 2.4477 |  |
|  | | 2 |  | 36 |  | 65.667 |  | 65.00 |  | 12.558 |  | 2.0931 |  |
| MASC2_Parent_oss/comp |  | 1 |  | 16 |  | 48.13 |  | 49.00 |  | 9.612 |  | 2.4029 |  |
|  | | 2 |  | 36 |  | 49.500 |  | 45.50 |  | 12.722 |  | 2.1204 |  |
| MASC2_Parent_sint.fisici |  | 1 |  | 16 |  | 61.75 |  | 59.00 |  | 12.871 |  | 3.2178 |  |
|  | | 2 |  | 36 |  | 58.139 |  | 59.00 |  | 11.485 |  | 1.9141 |  |
| MASC2_Parent_panico |  | 1 |  | 16 |  | 58.75 |  | 57.00 |  | 15.429 |  | 3.8574 |  |
|  | | 2 |  | 36 |  | 56.694 |  | 57.00 |  | 13.405 |  | 2.2342 |  |
| MASC2_Parent_tensione |  | 1 |  | 16 |  | 61.94 |  | 59.00 |  | 9.990 |  | 2.4974 |  |
|  | | 2 |  | 36 |  | 58.056 |  | 59.00 |  | 8.995 |  | 1.4992 |  |
| MASC2_Parent_evit.peric |  | 1 |  | 16 |  | 53.50 |  | 56.00 |  | 6.957 |  | 1.7393 |  |
|  | | 2 |  | 36 |  | 57.278 |  | 56.00 |  | 8.365 |  | 1.3942 |  |
| MASC2_Parent_probab. Ansia |  | 1 |  | 16 |  | 2.50 |  | 3.00 |  | 0.632 |  | 0.1581 |  |
|  | | 2 |  | 36 |  | 3.750 |  | 3.00 |  | 9.711 |  | 1.6185 |  |
| MASC2_Parent_ind. Incoerenza |  | 1 |  | 16 |  | 6.25 |  | 6.00 |  | 1.770 |  | 0.4425 |  |
|  | | 2 |  | 36 |  | 5.611 |  | 6.00 |  | 2.284 |  | 0.3806 |  |
| CDI2_Self_Tot |  | 1 |  | 16 |  | 51.06 |  | 49.00 |  | 6.547 |  | 1.6367 |  |
|  | | 2 |  | 36 |  | 48.389 |  | 49.00 |  | 5.658 |  | 0.9430 |  |
| CDI2_Self_probl. Emot |  | 1 |  | 16 |  | 50.00 |  | 47.00 |  | 10.080 |  | 2.5199 |  |
|  | | 2 |  | 36 |  | 45.333 |  | 47.00 |  | 9.292 |  | 1.5487 |  |
| CDI2_Self_umore neg/sint. Fisici |  | 1 |  | 16 |  | 51.63 |  | 50.00 |  | 8.547 |  | 2.1367 |  |
|  | | 2 |  | 36 |  | 48.417 |  | 50.00 |  | 5.992 |  | 0.9987 |  |
| CDI2_Self_autost neg |  | 1 |  | 16 |  | 50.44 |  | 48.00 |  | 7.650 |  | 1.9126 |  |
|  | | 2 |  | 36 |  | 46.833 |  | 48.00 |  | 4.469 |  | 0.7448 |  |
| CDI2_Self_probl. Funz |  | 1 |  | 16 |  | 55.50 |  | 54.00 |  | 6.314 |  | 1.5785 |  |
|  | | 2 |  | 36 |  | 53.722 |  | 54.00 |  | 6.889 |  | 1.1482 |  |
| CDI2_Self_ineff |  | 1 |  | 16 |  | 51.13 |  | 50.00 |  | 5.162 |  | 1.2906 |  |
|  | | 2 |  | 36 |  | 49.861 |  | 50.00 |  | 6.424 |  | 1.0706 |  |
| CDI2_Self_prob interpers |  | 1 |  | 16 |  | 53.19 |  | 53.00 |  | 4.370 |  | 1.0925 |  |
|  | | 2 |  | 36 |  | 52.667 |  | 53.00 |  | 5.851 |  | 0.9751 |  |
| CDI2_Parent_Tot |  | 1 |  | 16 |  | 60.06 |  | 56.00 |  | 13.344 |  | 3.3360 |  |
|  | | 2 |  | 36 |  | 55.111 |  | 56.00 |  | 8.651 |  | 1.4419 |  |
| CDI2_Parent_probl. Emot |  | 1 |  | 16 |  | 59.81 |  | 56.00 |  | 14.838 |  | 3.7095 |  |
|  | | 2 |  | 36 |  | 55.694 |  | 56.00 |  | 10.706 |  | 1.7843 |  |
| CDI2_Parent_probl. Funz |  | 1 |  | 16 |  | 57.75 |  | 55.00 |  | 8.866 |  | 2.2164 |  |
|  | | 2 |  | 36 |  | 53.806 |  | 54.00 |  | 6.624 |  | 1.1040 |  |
| CPRS A |  | 1 |  | 16 |  | 57.63 |  | 56.00 |  | 12.198 |  | 3.0494 |  |
|  | | 2 |  | 36 |  | 56.167 |  | 56.00 |  | 8.837 |  | 1.4728 |  |
| CPRS B |  | 1 |  | 16 |  | 68.50 |  | 65.00 |  | 13.221 |  | 3.3053 |  |
|  | | 2 |  | 36 |  | 63.944 |  | 65.00 |  | 10.329 |  | 1.7215 |  |
| CPRS C |  | 1 |  | 16 |  | 57.31 |  | 53.00 |  | 12.674 |  | 3.1685 |  |
|  | | 2 |  | 36 |  | 53.028 |  | 53.00 |  | 6.951 |  | 1.1585 |  |
| CPRS D |  | 1 |  | 16 |  | 63.38 |  | 61.00 |  | 17.235 |  | 4.3088 |  |
|  | | 2 |  | 36 |  | 61.056 |  | 61.00 |  | 11.422 |  | 1.9036 |  |
| CPRS E |  | 1 |  | 16 |  | 54.94 |  | 54.50 |  | 19.368 |  | 4.8421 |  |
|  | | 2 |  | 36 |  | 56.028 |  | 55.00 |  | 11.267 |  | 1.8778 |  |
| CPRS F |  | 1 |  | 16 |  | 69.63 |  | 66.00 |  | 15.222 |  | 3.8056 |  |
|  | | 2 |  | 36 |  | 65.389 |  | 66.00 |  | 13.939 |  | 2.3232 |  |
| CPRS G |  | 1 |  | 16 |  | 61.81 |  | 60.00 |  | 10.387 |  | 2.5968 |  |
|  | | 2 |  | 36 |  | 61.056 |  | 60.00 |  | 12.168 |  | 2.0280 |  |
| CPRS H |  | 1 |  | 16 |  | 64.06 |  | 62.00 |  | 11.352 |  | 2.8379 |  |
|  | | 2 |  | 36 |  | 62.833 |  | 62.00 |  | 11.418 |  | 1.9030 |  |
| CPRS I |  | 1 |  | 16 |  | 58.88 |  | 56.00 |  | 11.159 |  | 2.7897 |  |
|  | | 2 |  | 36 |  | 55.861 |  | 56.00 |  | 7.849 |  | 1.3082 |  |
| CPRS J |  | 1 |  | 16 |  | 60.38 |  | 59.00 |  | 9.047 |  | 2.2618 |  |
|  | | 2 |  | 36 |  | 59.750 |  | 59.00 |  | 8.544 |  | 1.4239 |  |
| CPRS K |  | 1 |  | 16 |  | 59.69 |  | 57.00 |  | 11.522 |  | 2.8806 |  |
|  | | 2 |  | 36 |  | 56.528 |  | 57.00 |  | 7.692 |  | 1.2820 |  |
| CPRS L |  | 1 |  | 16 |  | 65.69 |  | 62.00 |  | 10.613 |  | 2.6532 |  |
|  | | 2 |  | 36 |  | 61.472 |  | 62.00 |  | 10.038 |  | 1.6731 |  |
| CPRS M |  | 1 |  | 16 |  | 55.06 |  | 52.00 |  | 11.257 |  | 2.8144 |  |
|  | | 2 |  | 36 |  | 52.250 |  | 52.00 |  | 6.975 |  | 1.1625 |  |
| CPRS N |  | 1 |  | 16 |  | 62.44 |  | 58.50 |  | 11.075 |  | 2.7688 |  |
|  | | 2 |  | 36 |  | 56.833 |  | 58.00 |  | 8.571 |  | 1.4285 |  |
| PSI_PD_Madre |  | 1 |  | 16 |  | 41.44 |  | 42.00 |  | 26.156 |  | 6.5390 |  |
|  | | 2 |  | 36 |  | 41.444 |  | 42.00 |  | 22.308 |  | 3.7179 |  |
| PSI_P-CDI_Madre |  | 1 |  | 16 |  | 63.56 |  | 58.00 |  | 31.128 |  | 7.7819 |  |
|  | | 2 |  | 36 |  | 55.722 |  | 58.00 |  | 23.754 |  | 3.9590 |  |
| PSI_DC_Madre |  | 1 |  | 16 |  | 62.50 |  | 56.00 |  | 29.521 |  | 7.3802 |  |
|  | | 2 |  | 36 |  | 53.611 |  | 56.00 |  | 24.764 |  | 4.1274 |  |
| PSI_Risp Diff_Madre |  | 1 |  | 16 |  | 59.88 |  | 51.00 |  | 31.317 |  | 7.8294 |  |
|  | | 2 |  | 36 |  | 46.750 |  | 51.00 |  | 22.852 |  | 3.8086 |  |
| PSI_Stress_Madre |  | 1 |  | 16 |  | 50.44 |  | 57.00 |  | 29.241 |  | 7.3104 |  |
|  | | 2 |  | 36 |  | 59.694 |  | 57.00 |  | 20.285 |  | 3.3808 |  |
| PSI_PD_Padre |  | 1 |  | 16 |  | 50.75 |  | 51.00 |  | 15.304 |  | 3.8259 |  |
|  | | 2 |  | 36 |  | 50.083 |  | 51.00 |  | 16.191 |  | 2.6984 |  |
| PSI_P-CDI_Padre |  | 1 |  | 16 |  | 54.00 |  | 56.00 |  | 18.998 |  | 4.7496 |  |
|  | | 2 |  | 36 |  | 55.861 |  | 56.00 |  | 15.932 |  | 2.6554 |  |
| PSI_DC_Padre |  | 1 |  | 16 |  | 54.13 |  | 54.00 |  | 20.665 |  | 5.1663 |  |
|  | | 2 |  | 36 |  | 53.111 |  | 54.00 |  | 16.815 |  | 2.8024 |  |
| PSI_Risp Diff_Padre |  | 1 |  | 16 |  | 51.69 |  | 52.00 |  | 20.389 |  | 5.0972 |  |
|  | | 2 |  | 36 |  | 51.306 |  | 52.00 |  | 16.712 |  | 2.7854 |  |
| PSI_Stress_Padre |  | 1 |  | 16 |  | 53.50 |  | 54.00 |  | 16.601 |  | 4.1503 |  |
|  | | 2 |  | 36 |  | 53.306 |  | 54.00 |  | 12.533 |  | 2.0888 |  |
| C-GAS |  | 1 |  | 16 |  | 54.38 |  | 55.00 |  | 3.686 |  | 0.9214 |  |
|  | | 2 |  | 36 |  | 56.861 |  | 56.00 |  | 3.474 |  | 0.5789 |  |
| K-DEP |  | 1 |  | 16 |  | 1.94 |  | 2.00 |  | 0.250 |  | 0.0625 |  |
|  | | 2 |  | 36 |  | 1.972 |  | 2.00 |  | 0.167 |  | 0.0278 |  |
| K-E.MAN |  | 1 |  | 16 |  | 2.00 |  | 2.00 |  | 0.000 |  | 0.0000 |  |
|  | | 2 |  | 36 |  | 2.000 |  | 2.00 |  | 0.000 |  | 0.0000 |  |
| K-E.PSICOTICO |  | 1 |  | 16 |  | 1.94 |  | 2.00 |  | 0.443 |  | 0.1106 |  |
|  | | 2 |  | 36 |  | 1.972 |  | 2.00 |  | 0.167 |  | 0.0278 |  |
| K-DIST PANICO |  | 1 |  | 16 |  | 2.00 |  | 2.00 |  | 0.000 |  | 0.0000 |  |
|  | | 2 |  | 36 |  | 2.000 |  | 2.00 |  | 0.000 |  | 0.0000 |  |
| K-ANSIA SEP |  | 1 |  | 16 |  | 2.06 |  | 2.00 |  | 0.250 |  | 0.0625 |  |
|  | | 2 |  | 36 |  | 1.972 |  | 2.00 |  | 0.167 |  | 0.0278 |  |
| K-FOB.SOC |  | 1 |  | 16 |  | 2.06 |  | 2.00 |  | 0.443 |  | 0.1106 |  |
|  | | 2 |  | 36 |  | 1.944 |  | 2.00 |  | 0.232 |  | 0.0387 |  |
| K-FOB.SPEC |  | 1 |  | 16 |  | 2.06 |  | 2.00 |  | 0.250 |  | 0.0625 |  |
|  | | 2 |  | 36 |  | 1.972 |  | 2.00 |  | 0.167 |  | 0.0278 |  |
| K-DAG |  | 1 |  | 16 |  | 1.94 |  | 2.00 |  | 0.574 |  | 0.1434 |  |
|  | | 2 |  | 36 |  | 1.806 |  | 2.00 |  | 0.525 |  | 0.0875 |  |
| K-DOC |  | 1 |  | 16 |  | 2.00 |  | 2.00 |  | 0.000 |  | 0.0000 |  |
|  | | 2 |  | 36 |  | 1.972 |  | 2.00 |  | 0.291 |  | 0.0486 |  |
| K-ENU |  | 1 |  | 16 |  | 2.00 |  | 2.00 |  | 0.000 |  | 0.0000 |  |
|  | | 2 |  | 36 |  | 2.000 |  | 2.00 |  | 0.000 |  | 0.0000 |  |
| K-ENC |  | 1 |  | 16 |  | 2.00 |  | 2.00 |  | 0.000 |  | 0.0000 |  |
|  | | 2 |  | 36 |  | 2.000 |  | 2.00 |  | 0.000 |  | 0.0000 |  |
| K-AN.NERV |  | 1 |  | 16 |  | 2.00 |  | 2.00 |  | 0.000 |  | 0.0000 |  |
|  | | 2 |  | 36 |  | 2.000 |  | 2.00 |  | 0.000 |  | 0.0000 |  |
| K-BUL.NERV |  | 1 |  | 16 |  | 2.00 |  | 2.00 |  | 0.000 |  | 0.0000 |  |
|  | | 2 |  | 36 |  | 2.000 |  | 2.00 |  | 0.000 |  | 0.0000 |  |
| K-ADHD |  | 1 |  | 16 |  | 1.69 |  | 2.00 |  | 0.602 |  | 0.1505 |  |
|  | | 2 |  | 36 |  | 1.861 |  | 2.00 |  | 0.424 |  | 0.0707 |  |
| K-DOP |  | 1 |  | 16 |  | 1.88 |  | 2.00 |  | 0.342 |  | 0.0854 |  |
|  | | 2 |  | 36 |  | 2.000 |  | 2.00 |  | 0.239 |  | 0.0398 |  |
| K-DIST.CONDOTTA |  | 1 |  | 16 |  | 2.00 |  | 2.00 |  | 0.000 |  | 0.0000 |  |
|  | | 2 |  | 36 |  | 2.000 |  | 2.00 |  | 0.000 |  | 0.0000 |  |
| K-TIC |  | 1 |  | 16 |  | 2.00 |  | 2.00 |  | 0.000 |  | 0.0000 |  |
|  | | 2 |  | 36 |  | 2.000 |  | 2.00 |  | 0.000 |  | 0.0000 |  |
| K-AB.SOST. |  | 1 |  | 16 |  | 2.00 |  | 2.00 |  | 0.000 |  | 0.0000 |  |
|  | | 2 |  | 36 |  | 2.000 |  | 2.00 |  | 0.000 |  | 0.0000 |  |
| K-PTSD |  | 1 |  | 16 |  | 2.00 |  | 2.00 |  | 0.000 |  | 0.0000 |  |
|  | | 2 |  | 36 |  | 2.000 |  | 2.00 |  | 0.000 |  | 0.0000 |  |
| K5-disregolazione umore |  | 1 |  | 16 |  | 2.06 |  | 2.00 |  | 0.250 |  | 0.0625 |  |
|  | | 2 |  | 36 |  | 2.000 |  | 2.00 |  | 0.000 |  | 0.0000 |  |
| K5-agorafobia |  | 1 |  | 16 |  | 2.00 |  | 2.00 |  | 0.000 |  | 0.0000 |  |
|  | | 2 |  | 36 |  | 2.000 |  | 2.00 |  | 0.000 |  | 0.0000 |  |
| K5-mutismo |  | 1 |  | 16 |  | 2.00 |  | 2.00 |  | 0.000 |  | 0.0000 |  |
|  | | 2 |  | 36 |  | 2.000 |  | 2.00 |  | 0.000 |  | 0.0000 |  |
| K5-autismo |  | 1 |  | 16 |  | 2.00 |  | 2.00 |  | 0.000 |  | 0.0000 |  |
|  | | 2 |  | 36 |  | 2.000 |  | 2.00 |  | 0.000 |  | 0.0000 |  |
| K-ADHD_Type |  | 1 |  | 16 |  | 1.88 |  | 2.00 |  | 0.806 |  | 0.2016 |  |
|  | | 2 |  | 36 |  | 2.194 |  | 2.00 |  | 0.710 |  | 0.1183 |  |
| SDSC DIMS |  | 1 |  | 16 |  | 74.75 |  | 73.00 |  | 13.983 |  | 3.4958 |  |
|  | | 2 |  | 36 |  | 55.833 |  | 54.00 |  | 11.656 |  | 1.9426 |  |
| SDSC DRS |  | 1 |  | 16 |  | 64.00 |  | 61.00 |  | 19.270 |  | 4.8175 |  |
|  | | 2 |  | 36 |  | 49.806 |  | 45.00 |  | 6.844 |  | 1.1407 |  |
| SDSC DA |  | 1 |  | 16 |  | 62.56 |  | 58.00 |  | 17.750 |  | 4.4375 |  |
|  | | 2 |  | 36 |  | 48.111 |  | 47.00 |  | 3.520 |  | 0.5866 |  |
| SDSC DTVS |  | 1 |  | 16 |  | 59.94 |  | 60.00 |  | 13.458 |  | 3.3646 |  |
|  | | 2 |  | 36 |  | 48.333 |  | 47.50 |  | 6.472 |  | 1.0787 |  |
| SDSC DES |  | 1 |  | 16 |  | 66.38 |  | 64.00 |  | 14.755 |  | 3.6888 |  |
|  | | 2 |  | 36 |  | 52.250 |  | 50.00 |  | 10.393 |  | 1.7322 |  |
| SDSC IPN |  | 1 |  | 16 |  | 51.13 |  | 45.00 |  | 13.210 |  | 3.3026 |  |
|  | | 2 |  | 36 |  | 47.944 |  | 45.00 |  | 7.243 |  | 1.2071 |  |
|  | | | | | | | | | | | | | |

*Legend.* M=mean; MEd= median; SD= standard deviation; SE= standard error. Group 1= no sleep problems ad depicted by SDSC test; Group 2 =sleep problems ad depicted by SDSC test.

**Table 2 S. independent two-sample *t* test. Differences Between Goup 1 and Group 2 Scores on All Outcome Measures.**

|  | | **Statistic** | | | **df** | | **p** | | **Mean Difference** | | | **SE** | | **Cohen’s d+** | | |
| --- | --- | --- | --- | --- | --- | --- | --- | --- | --- | --- | --- | --- | --- | --- | --- | --- |
| QI TOT |  |  | 0.5227 |  | | 50.0 |  | 0.603 |  | 3.55556 |  | | 6.8021 |  |  | 0.15706 | |  |
| WISC-IV_ICV |  |  | 0.2801 |  | | 50.0 |  | 0.781 |  | 1.29167 |  | | 4.6116 |  |  | 0.08416 | |  |
| WISC-IV_IRP |  |  | -0.0966 | ᵃ | | 50.0 |  | 0.923 |  | -0.45139 |  | | 4.6721 |  |  | -0.02903 | |  |
| WISC-IV_IML |  |  | 0.4727 |  | | 50.0 |  | 0.638 |  | 1.82639 |  | | 3.8638 |  |  | 0.14203 | |  |
| WISC IV_IVE |  |  | -0.1275 |  | | 50.0 |  | 0.899 |  | -0.56250 |  | | 4.4108 |  |  | -0.03832 | |  |
| ABAS-GAC comp |  |  | -0.8111 |  | | 50.0 |  | 0.421 |  | -4.58333 |  | | 5.6505 |  |  | -0.24372 | |  |
| ABAS-DAC comp |  |  | -1.2310 |  | | 50.0 |  | 0.224 |  | -6.40972 |  | | 5.2071 |  |  | -0.36986 | |  |
| ABAS-DAS comp |  |  | 0.2901 |  | | 50.0 |  | 0.773 |  | 1.81250 |  | | 6.2471 |  |  | 0.08717 | |  |
| ABAS-DAP comp |  |  | -0.8793 |  | | 50.0 |  | 0.383 |  | -4.78472 |  | | 5.4416 |  |  | -0.26419 | |  |
| ABAS-GAC perc |  |  | -0.8533 |  | | 50.0 |  | 0.398 |  | -6.36806 |  | | 7.4633 |  |  | -0.25637 | |  |
| ABAS-DAC perc |  |  | -1.1617 |  | | 50.0 |  | 0.251 |  | -8.36806 |  | | 7.2032 |  |  | -0.34905 | |  |
| ABAS-DAS perc |  |  | 0.0111 |  | | 50.0 |  | 0.991 |  | 0.08333 |  | | 7.5124 |  |  | 0.00333 | |  |
| ABAS-DAP perc |  |  | -0.7952 |  | | 50.0 |  | 0.430 |  | -5.67917 |  | | 7.1416 |  |  | -0.23894 | |  |
| MASC2_Self_Tot |  |  | 2.4371 |  | | 50.0 |  | 0.018 |  | 6.13889 |  | | 2.5190 |  |  | 0.73224 | |  |
| MASC2_Self_Ansia sep/fobie |  |  | 1.9321 |  | | 50.0 |  | 0.059 |  | 4.60417 |  | | 2.3829 |  |  | 0.58054 | |  |
| MASC2_Self_GAD |  |  | 2.5403 |  | | 50.0 |  | 0.014 |  | 5.84028 |  | | 2.2990 |  |  | 0.76327 | |  |
| MASC2_Self_Ansia sociale |  |  | 2.9237 |  | | 50.0 |  | 0.005 |  | 6.01389 |  | | 2.0569 |  |  | 0.87847 | |  |
| MASC2_Self_umil/rif |  |  | 2.6165 |  | | 50.0 |  | 0.012 |  | 4.99306 |  | | 1.9083 |  |  | 0.78617 | |  |
| MASC2_Self_Ansia prest |  |  | 2.3578 |  | | 50.0 |  | 0.022 |  | 5.60417 |  | | 2.3769 |  |  | 0.70843 | |  |
| MASC2_Self_oss/comp |  |  | 1.0310 |  | | 50.0 |  | 0.308 |  | 2.74306 |  | | 2.6606 |  |  | 0.30977 | |  |
| MASC2_Self_sint.fisici |  |  | 2.7240 |  | | 50.0 |  | 0.009 |  | 6.34722 |  | | 2.3301 |  |  | 0.81847 | |  |
| MASC2_Self_panico |  |  | 2.2833 |  | | 50.0 |  | 0.027 |  | 5.08333 |  | | 2.2263 |  |  | 0.68606 | |  |
| MASC2_Self_tensione |  |  | 2.7757 |  | | 50.0 |  | 0.008 |  | 6.63889 |  | | 2.3918 |  |  | 0.83400 | |  |
| MASC2_Self_evit.peric |  |  | 1.1505 |  | | 50.0 |  | 0.255 |  | 1.56944 |  | | 1.3641 |  |  | 0.34568 | |  |
| MASC2_Self_probab. Ansia |  |  | 1.8921 |  | | 50.0 |  | 0.064 |  | 0.45833 |  | | 0.2422 |  |  | 0.56849 | |  |
| MASC2_Self_ind. Incoerenza |  |  | 1.8855 |  | | 50.0 |  | 0.065 |  | 0.90278 |  | | 0.4788 |  |  | 0.56652 | |  |
| MASC2_Parent_Tot |  |  | 0.2431 |  | | 50.0 |  | 0.809 |  | 0.87500 |  | | 3.5987 |  |  | 0.07306 | |  |
| MASC2_Parent_Ansia sep/fobie |  |  | -0.4078 |  | | 50.0 |  | 0.685 |  | -1.32639 |  | | 3.2522 |  |  | -0.12254 | |  |
| MASC2_Parent_GAD |  |  | 0.5871 |  | | 50.0 |  | 0.560 |  | 1.95139 |  | | 3.3237 |  |  | 0.17640 | |  |
| MASC2_Parent_Ansia sociale |  |  | 1.2116 | ᵃ | | 50.0 |  | 0.231 |  | 5.59722 |  | | 4.6197 |  |  | 0.36404 | |  |
| MASC2_Parent_umil/rif |  |  | 1.1552 | ᵃ | | 50.0 |  | 0.253 |  | 4.73611 |  | | 4.0998 |  |  | 0.34709 | |  |
| MASC2_Parent_Ansia prest |  |  | -0.0647 |  | | 50.0 |  | 0.949 |  | -0.22917 |  | | 3.5444 |  |  | -0.01943 | |  |
| MASC2_Parent_oss/comp |  |  | -0.3854 |  | | 50.0 |  | 0.702 |  | -1.37500 |  | | 3.5680 |  |  | -0.11579 | |  |
| MASC2_Parent_sint.fisici |  |  | 1.0085 |  | | 50.0 |  | 0.318 |  | 3.61111 |  | | 3.5808 |  |  | 0.30301 | |  |
| MASC2_Parent_panico |  |  | 0.4872 |  | | 50.0 |  | 0.628 |  | 2.05556 |  | | 4.2195 |  |  | 0.14637 | |  |
| MASC2_Parent_tensione |  |  | 1.3885 |  | | 50.0 |  | 0.171 |  | 3.88194 |  | | 2.7957 |  |  | 0.41720 | |  |
| MASC2_Parent_evit.peric |  |  | -1.5778 |  | | 50.0 |  | 0.121 |  | -3.77778 |  | | 2.3944 |  |  | -0.47406 | |  |
| MASC2_Parent_probab. Ansia |  |  | -0.5116 |  | | 50.0 |  | 0.611 |  | -1.25000 |  | | 2.4435 |  |  | -0.15371 | |  |
| MASC2_Parent_ind. Incoerenza |  |  | 0.9924 |  | | 50.0 |  | 0.326 |  | 0.63889 |  | | 0.6438 |  |  | 0.29817 | |  |
| CDI2_Self_Tot |  |  | 1.4983 |  | | 50.0 |  | 0.140 |  | 2.67361 |  | | 1.7844 |  |  | 0.45019 | |  |
| CDI2_Self_probl. Emot |  |  | 1.6289 |  | | 50.0 |  | 0.110 |  | 4.66667 |  | | 2.8650 |  |  | 0.48941 | |  |
| CDI2_Self_umore neg/sint. Fisici |  |  | 1.5567 |  | | 50.0 |  | 0.126 |  | 3.20833 |  | | 2.0610 |  |  | 0.46773 | |  |
| CDI2_Self_autost neg |  |  | 2.1360 |  | | 50.0 |  | 0.038 |  | 3.60417 |  | | 1.6874 |  |  | 0.64177 | |  |
| CDI2_Self_probl. Funz |  |  | 0.8802 |  | | 50.0 |  | 0.383 |  | 1.77778 |  | | 2.0197 |  |  | 0.26447 | |  |
| CDI2_Self_ineff |  |  | 0.6927 |  | | 50.0 |  | 0.492 |  | 1.26389 |  | | 1.8247 |  |  | 0.20812 | |  |
| CDI2_Self_prob interpers |  |  | 0.3181 |  | | 50.0 |  | 0.752 |  | 0.52083 |  | | 1.6371 |  |  | 0.09559 | |  |
| CDI2_Parent_Tot |  |  | 1.6020 |  | | 50.0 |  | 0.115 |  | 4.95139 |  | | 3.0907 |  |  | 0.48135 | |  |
| CDI2_Parent_probl. Emot |  |  | 1.1332 |  | | 50.0 |  | 0.263 |  | 4.11806 |  | | 3.6340 |  |  | 0.34048 | |  |
| CDI2_Parent_probl. Funz |  |  | 1.7817 |  | | 50.0 |  | 0.081 |  | 3.94444 |  | | 2.2139 |  |  | 0.53532 | |  |
| CPRS A |  |  | 0.4871 |  | | 50.0 |  | 0.628 |  | 1.45833 |  | | 2.9940 |  |  | 0.14635 | |  |
| CPRS B |  |  | 1.3448 |  | | 50.0 |  | 0.185 |  | 4.55556 |  | | 3.3876 |  |  | 0.40405 | |  |
| CPRS C |  |  | 1.5747 | ᵃ | | 50.0 |  | 0.122 |  | 4.28472 |  | | 2.7209 |  |  | 0.47314 | |  |
| CPRS D |  |  | 0.5747 | ᵃ | | 50.0 |  | 0.568 |  | 2.31944 |  | | 4.0360 |  |  | 0.17267 | |  |
| CPRS E |  |  | -0.2557 |  | | 50.0 |  | 0.799 |  | -1.09028 |  | | 4.2640 |  |  | -0.07683 | |  |
| CPRS F |  |  | 0.9834 |  | | 50.0 |  | 0.330 |  | 4.23611 |  | | 4.3075 |  |  | 0.29548 | |  |
| CPRS G |  |  | 0.2160 |  | | 50.0 |  | 0.830 |  | 0.75694 |  | | 3.5041 |  |  | 0.06491 | |  |
| CPRS H |  |  | 0.3589 |  | | 50.0 |  | 0.721 |  | 1.22917 |  | | 3.4247 |  |  | 0.10784 | |  |
| CPRS I |  |  | 1.1181 |  | | 50.0 |  | 0.269 |  | 3.01389 |  | | 2.6955 |  |  | 0.33595 | |  |
| CPRS J |  |  | 0.2392 |  | | 50.0 |  | 0.812 |  | 0.62500 |  | | 2.6133 |  |  | 0.07186 | |  |
| CPRS K |  |  | 1.1667 |  | | 50.0 |  | 0.249 |  | 3.15972 |  | | 2.7083 |  |  | 0.35054 | |  |
| CPRS L |  |  | 1.3735 |  | | 50.0 |  | 0.176 |  | 4.21528 |  | | 3.0690 |  |  | 0.41269 | |  |
| CPRS M |  |  | 1.1026 | ᵃ | | 50.0 |  | 0.275 |  | 2.81250 |  | | 2.5508 |  |  | 0.33129 | |  |
| CPRS N |  |  | 1.9858 |  | | 50.0 |  | 0.053 |  | 5.60417 |  | | 2.8221 |  |  | 0.59667 | |  |
| PSI_PD_Madre |  |  | -9.82e−4 |  | | 50.0 |  | 0.999 |  | -0.00694 |  | | 7.0693 |  |  | -2.95e−4 | |  |
| PSI_P-CDI_Madre |  |  | 0.9965 |  | | 50.0 |  | 0.324 |  | 7.84028 |  | | 7.8677 |  |  | 0.29942 | |  |
| PSI_DC_Madre |  |  | 1.1256 |  | | 50.0 |  | 0.266 |  | 8.88889 |  | | 7.8967 |  |  | 0.33822 | |  |
| PSI_Risp Diff_Madre |  |  | 1.7006 |  | | 50.0 |  | 0.095 |  | 13.12500 |  | | 7.7177 |  |  | 0.51098 | |  |
| PSI_Stress_Madre |  |  | -1.3203 |  | | 50.0 |  | 0.193 |  | -9.25694 |  | | 7.0115 |  |  | -0.39669 | |  |
| PSI_PD_Padre |  |  | 0.1393 |  | | 50.0 |  | 0.890 |  | 0.66667 |  | | 4.7863 |  |  | 0.04185 | |  |
| PSI_P-CDI_Padre |  |  | -0.3663 |  | | 50.0 |  | 0.716 |  | -1.86111 |  | | 5.0810 |  |  | -0.11006 | |  |
| PSI_DC_Padre |  |  | 0.1869 |  | | 50.0 |  | 0.853 |  | 1.01389 |  | | 5.4252 |  |  | 0.05615 | |  |
| PSI_Risp Diff_Padre |  |  | 0.0710 |  | | 50.0 |  | 0.944 |  | 0.38194 |  | | 5.3767 |  |  | 0.02134 | |  |
| PSI_Stress_Padre |  |  | 0.0466 |  | | 50.0 |  | 0.963 |  | 0.19444 |  | | 4.1702 |  |  | 0.01401 | |  |
| C-GAS |  |  | -2.3383 |  | | 50.0 |  | 0.023 |  | -2.48611 |  | | 1.0632 |  |  | -0.70259 | |  |
| K-DEP |  |  | -0.5913 |  | | 50.0 |  | 0.557 |  | -0.03472 |  | | 0.0587 |  |  | -0.17767 | |  |
| K-E.MAN |  |  | NaN | ᵇ | |  |  |  |  |  |  | |  |  |  |  | |  |
| K-E.PSICOTICO |  |  | -0.4133 | ᵃ | | 50.0 |  | 0.681 |  | -0.03472 |  | | 0.0840 |  |  | -0.12417 | |  |
| K-DIST PANICO |  |  | NaN | ᵇ | |  |  |  |  |  |  | |  |  |  |  | |  |
| K-ANSIA SEP |  |  | 1.5374 |  | | 50.0 |  | 0.130 |  | 0.09028 |  | | 0.0587 |  |  | 0.46193 | |  |
| K-FOB.SOC |  |  | 1.2646 |  | | 50.0 |  | 0.212 |  | 0.11806 |  | | 0.0934 |  |  | 0.37998 | |  |
| K-FOB.SPEC |  |  | 1.5374 |  | | 50.0 |  | 0.130 |  | 0.09028 |  | | 0.0587 |  |  | 0.46193 | |  |
| K-DAG |  |  | 0.8133 |  | | 50.0 |  | 0.420 |  | 0.13194 |  | | 0.1622 |  |  | 0.24437 | |  |
| K-DOC |  |  | 0.3792 |  | | 50.0 |  | 0.706 |  | 0.02778 |  | | 0.0733 |  |  | 0.11393 | |  |
| K-ENU |  |  | NaN | ᵇ | |  |  |  |  |  |  | |  |  |  |  | |  |
| K-ENC |  |  | NaN | ᵇ | |  |  |  |  |  |  | |  |  |  |  | |  |
| K-AN.NERV |  |  | NaN | ᵇ | |  |  |  |  |  |  | |  |  |  |  | |  |
| K-BUL.NERV |  |  | NaN | ᵇ | |  |  |  |  |  |  | |  |  |  |  | |  |
| K-ADHD |  |  | -1.1923 | ᵃ | | 50.0 |  | 0.239 |  | -0.17361 |  | | 0.1456 |  |  | -0.35824 | |  |
| K-DOP |  |  | -1.5191 | ᵃ | | 50.0 |  | 0.135 |  | -0.12500 |  | | 0.0823 |  |  | -0.45644 | |  |
| K-DIST.CONDOTTA |  |  | NaN | ᵇ | |  |  |  |  |  |  | |  |  |  |  | |  |
| K-TIC |  |  | NaN | ᵇ | |  |  |  |  |  |  | |  |  |  |  | |  |
| K-AB.SOST. |  |  | NaN | ᵇ | |  |  |  |  |  |  | |  |  |  |  | |  |
| K-PTSD |  |  | NaN | ᵇ | |  |  |  |  |  |  | |  |  |  |  | |  |
| K5-disregolazione umore |  |  | 1.5191 | ᵃ | | 50.0 |  | 0.135 |  | 0.06250 |  | | 0.0411 |  |  | 0.45644 | |  |
| K5-agorafobia |  |  | NaN | ᵇ | |  |  |  |  |  |  | |  |  |  |  | |  |
| K5-mutismo |  |  | NaN | ᵇ | |  |  |  |  |  |  | |  |  |  |  | |  |
| K5-autismo |  |  | NaN | ᵇ | |  |  |  |  |  |  | |  |  |  |  | |  |
| K-ADHD_Type |  |  | -1.4365 |  | | 50.0 |  | 0.157 |  | -0.31944 |  | | 0.2224 |  |  | -0.43161 | |  |
| SDSC DIMS |  |  | 5.0773 |  | | 50.0 |  | < .001 |  | 18.91667 |  | | 3.7257 |  |  | 1.52554 | |  |
| SDSC DRS |  |  | 3.9342 | ᵃ | | 50.0 |  | < .001 |  | 14.19444 |  | | 3.6080 |  |  | 1.18208 | |  |
| SDSC DA |  |  | 4.7348 | ᵃ | | 50.0 |  | < .001 |  | 14.45139 |  | | 3.0522 |  |  | 1.42263 | |  |
| SDSC DTVS |  |  | 4.2225 | ᵃ | | 50.0 |  | < .001 |  | 11.60417 |  | | 2.7482 |  |  | 1.26870 | |  |
| SDSC DES |  |  | 3.9600 |  | | 50.0 |  | < .001 |  | 14.12500 |  | | 3.5669 |  |  | 1.18983 | |  |
| SDSC IPN |  |  | 1.1216 | ᵃ | | 50.0 |  | 0.267 |  | 3.18056 |  | | 2.8357 |  |  | 0.33700 | |  |

*Legend.*
